# Supplementary material
Source: HighWire-hosted journal article supplement (http://www.qdcxjkg.com/highwire/filestream/126495/field_highwire_adjunct_files/1/ERJ-00937-2015_Figure_S2.pdf)

**A**

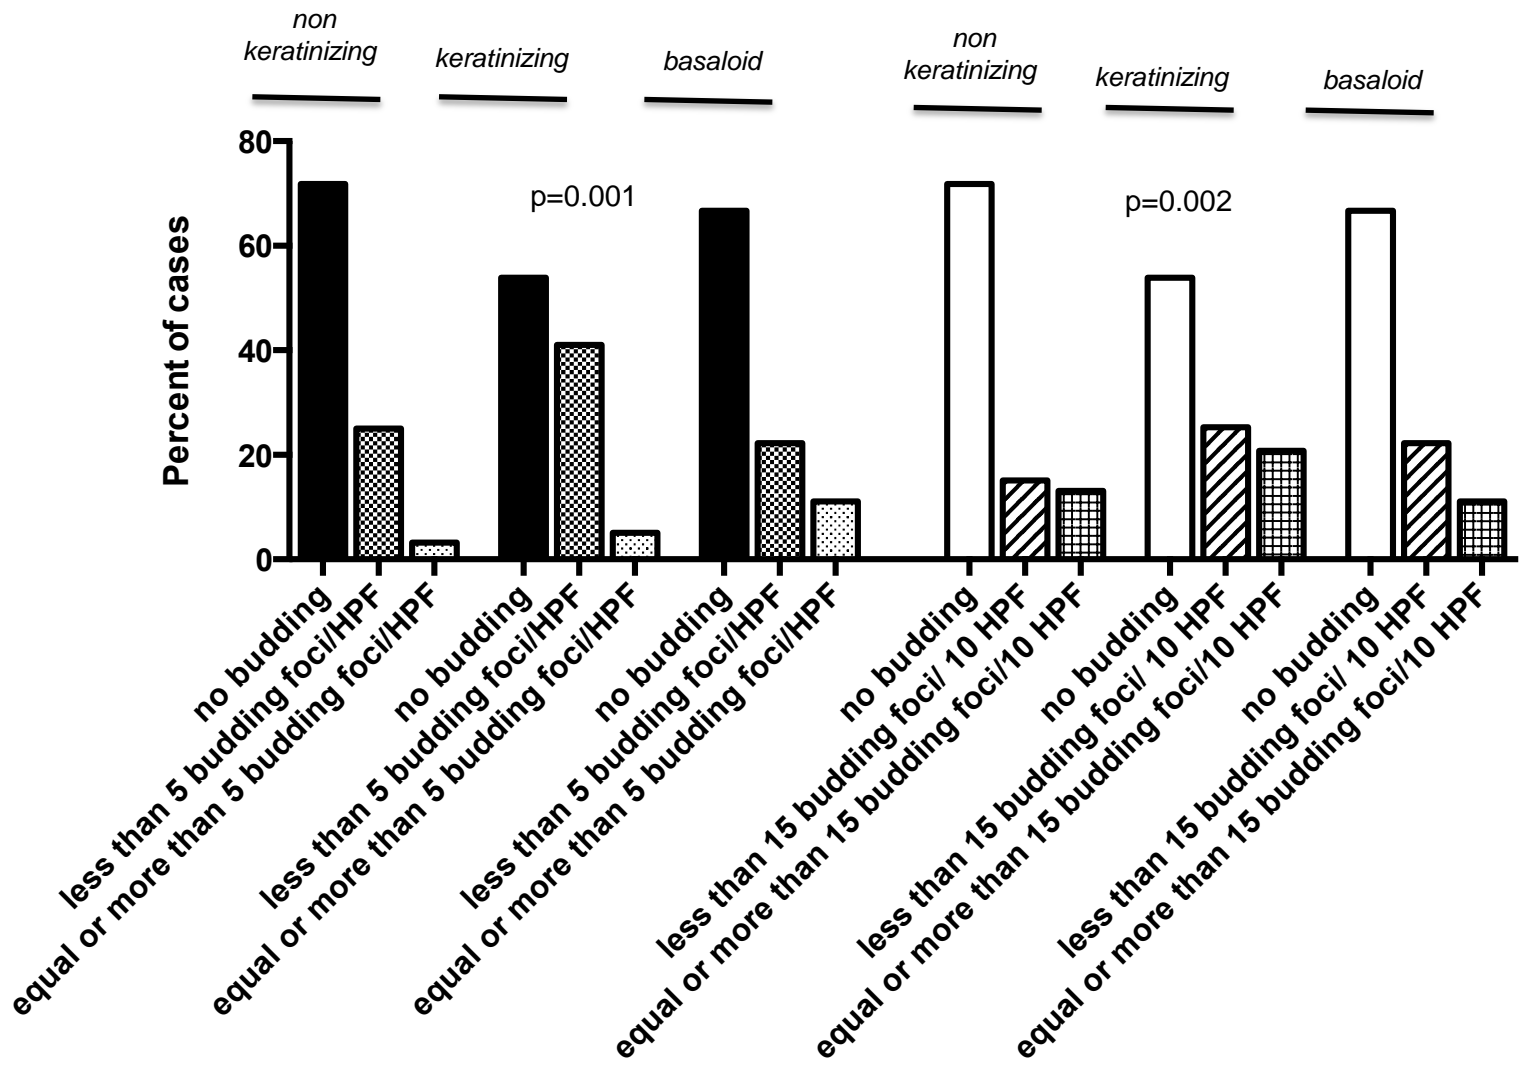

**B**

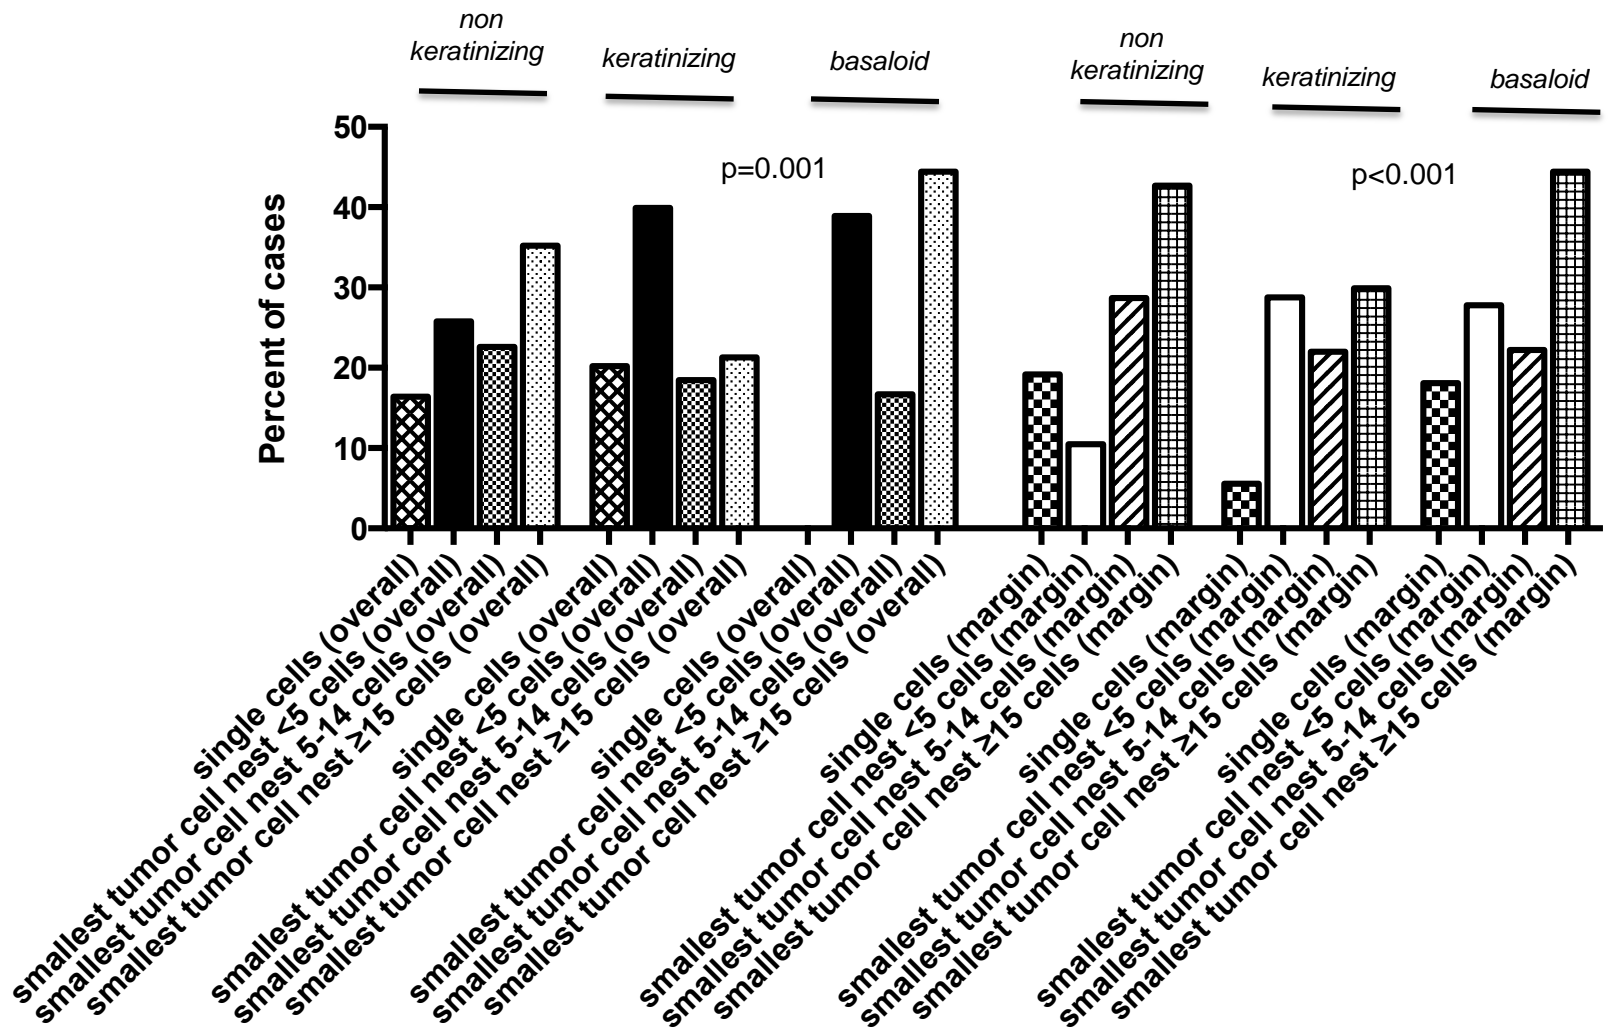

Supplement: ERJ-00937-2015_Figure_S2.pdf [file ERJ-00937-2015_Figure_S2.pdf]
